# Supplementary material
Source: Springer Nature journal article supplement (https://www.springermedizin.de/resource/supplementary/12889_2007_932_MOESM1_ESM.pdf/9502130)

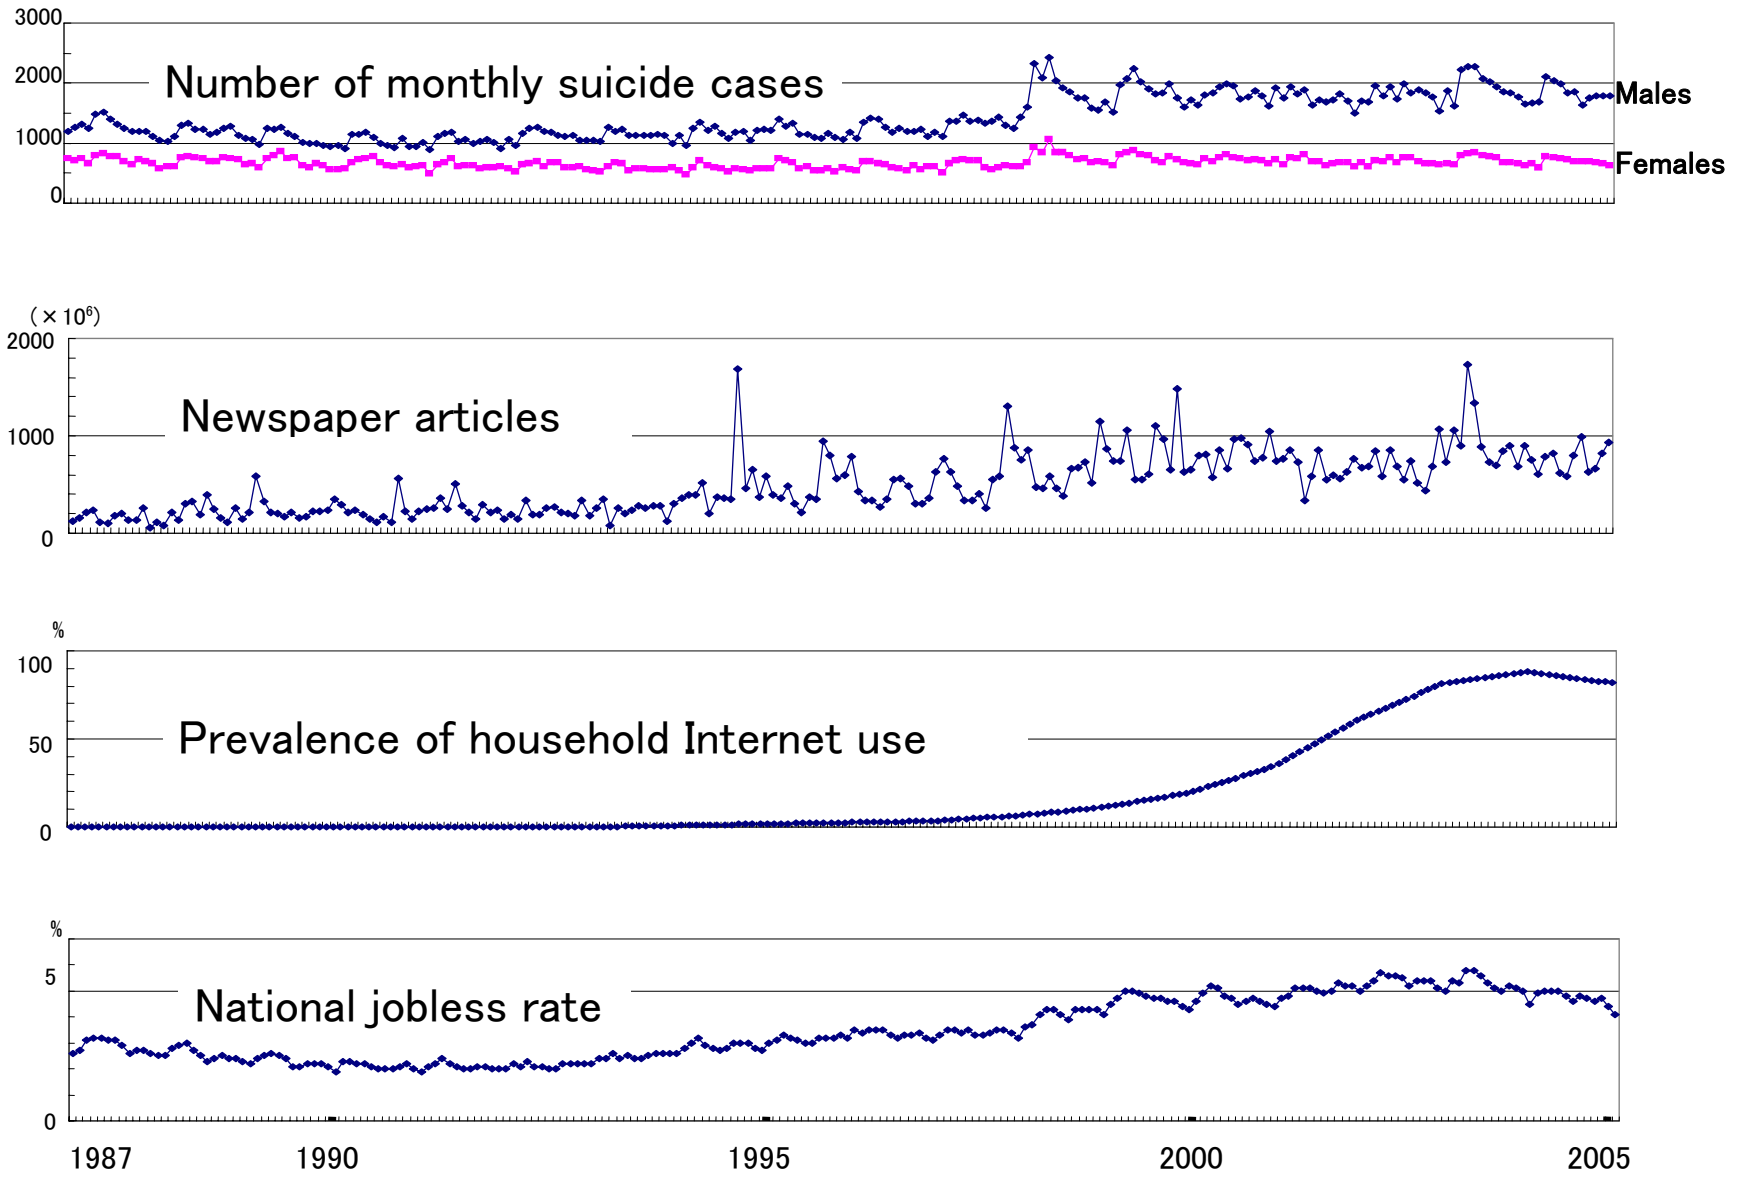

Fig. 1

Supplement: MOESM1 [file 9502130]
